# Supplementary material
Source: PubMed Central journal article supplement (PMC4281888)
Supplement: NIHMS513766-supplement-Supplementary_file_S1.pdf [file NIHMS513766-supplement-Supplementary_file_S1.pdf]

**Supplemental table 1**  
**List of antibodies.**

| <b>Target</b>                 | <b>Supplier</b>             | <b>Catalog #</b> | <b>Dilution</b>      |
|-------------------------------|-----------------------------|------------------|----------------------|
| <i>Western Blotting</i>       |                             |                  |                      |
| Total Smad3                   | Cell Signaling Technologies | 9523             | 1:1,000              |
| phospho-(S423/S425)-Smad3     | Cell Signaling Technologies | 5920             | 1:500                |
| Total cofilin                 | Cell Signaling Technologies | 5175             | 1:1,000              |
| phospho-(S3)-cofilin          | Cell Signaling Technologies | 3313             | 1:1,000              |
| ROCK1                         | Cell Signaling Technologies | 4035             | 1:1,000              |
| cAbl                          | AbCam                       | AB15130          | 1:500                |
| phospho-(Y415)-cAbl           | AbCam                       | AB47315          | 1:500                |
| GAPDH                         | AbCam                       | AB9485           | 1:10,000             |
| Anti-Rabbit IgG:HRP           | Cell Signaling Technologies | 7074             | 1:5,000              |
| Heme-oxygenase-1              | R&D Systems                 | MAB3776          | 1:2500               |
| Phospho-LIMK1/2 (T508/T505)   | Cell Signaling Technologies | 3841             | 1:1,000              |
| Total LimK2                   | Cell Signaling Technologies | 3845             | 1:1,000              |
| Chronophin/PDXP               | Cell Signaling Technologies | 4686             | 1:1,000              |
| SMAD4                         | Santa Cruz Biotechnologies  | sc-7154          | 1:1000               |
| $\alpha$ -Smooth Muscle Actin | AbCam                       | AB5694           | 1:10,000             |
| <i>Immunoprecipitation</i>    |                             |                  |                      |
| SMAD4                         | Santa Cruz Biotechnologies  | sc-7966          | 2 $\mu$ g/mg protein |
| Protein A:Agarose             | Millipore                   | 16-266           | 100 $\mu$ L/IP       |

**Supplemental figure 1. Trend plots and mass fragmentation of ions.** A) Trending plot of metabolite 1 with  $m/z$  value of 653.099<sup>-</sup> (n = 5). B) Trending plot of metabolite 2 with  $m/z$  value of 395.007<sup>-</sup> (n = 5). C) The mass fragmentation of metabolite 1. D) The mass fragmentation of metabolite 2.
