# Supplementary material
Source: PubMed Central journal article supplement (PMC4281888)

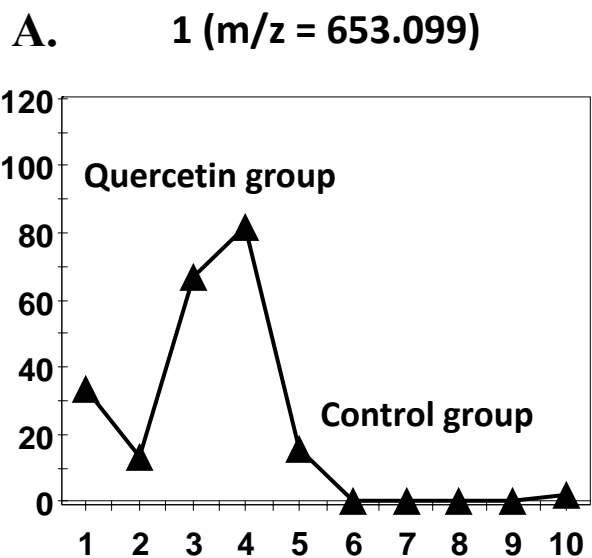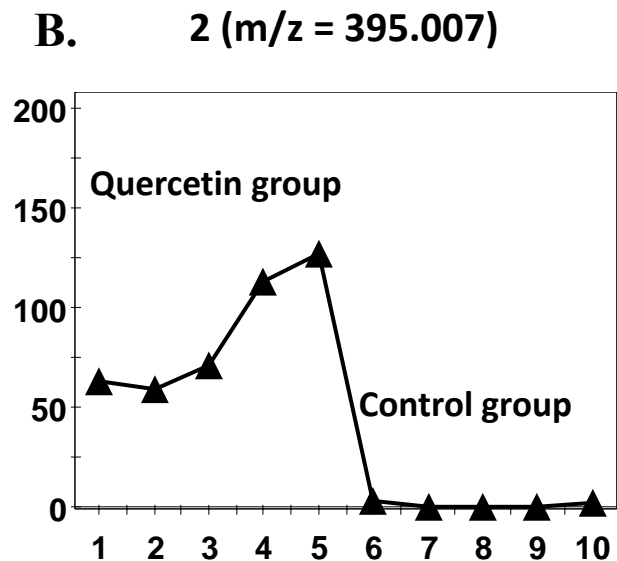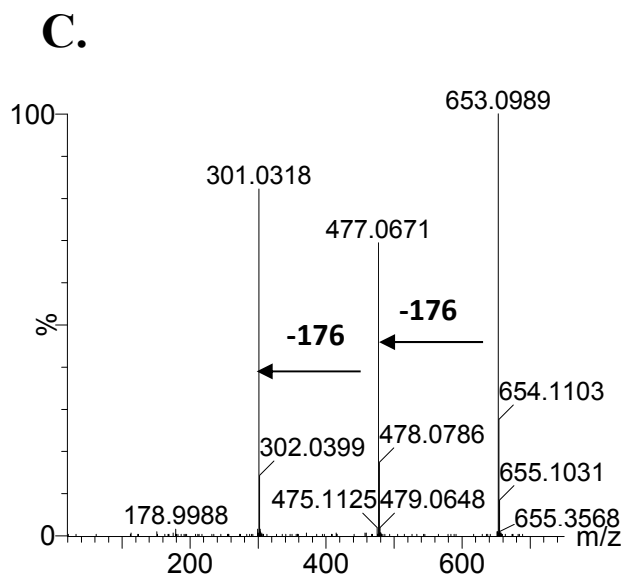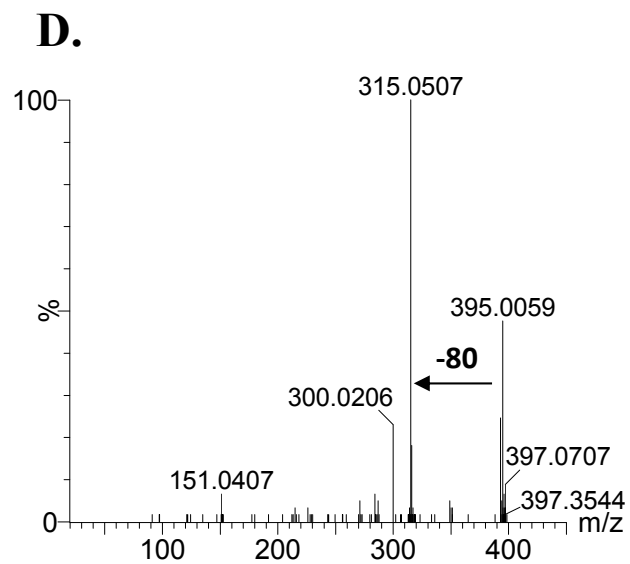

Supplemental Figure S1

Supplement: NIHMS513766-supplement-Supplementary_file_S2.pdf [file NIHMS513766-supplement-Supplementary_file_S2.pdf]
